# Supplementary material for: A novel material Cs2RbxAg1−xIn0.875Bi0.125Cl6 with a special blue shift and application for white light LED devices
Source: Royal Society of Chemistry journal article supplement (doi:10.1039/d2cp03526j), 2022-01-01
Supplement: d2cp03526j1.pdf [file d2cp03526j1.pdf]

**A novel material  $\text{Cs}_2\text{Rb}_x\text{Ag}_{1-x}\text{In}_{0.875}\text{Bi}_{0.125}\text{Cl}_6$  with special blue shift  
and application for white light LED devices**

Xixiang Wang<sup>1</sup>, Chen Niu<sup>2</sup>, Wenjian Liao<sup>1</sup>, Shiliang Mei<sup>3</sup>, Rongrong Hu<sup>2</sup>, Yang Li<sup>4</sup>, Bobo Yang<sup>2\*</sup>,

Yong Chen<sup>1\*</sup> and Jun Zou<sup>2,5,6\*</sup>

1 School of Chemistry and Environmental Engineering, Shanghai Institute of Technology, Shanghai 201418, People's Republic of China

2 School of Science, Shanghai Institute of Technology, Shanghai 201418, People's Republic of China

3 Institute for Electric Light Sources, Fudan University, Shanghai 200433, People's Republic of China

4 School of Materials Science and Engineering, Shanghai Institute of Technology, Shanghai 201418, People's Republic of China

5 National Semiconductor Lighting Application System Engineering Technology Research Center, Shanghai 201418, People's Republic of China

6 Institute of New Materials & Industrial Technology, Wenzhou University, Wenzhou 325024, People's Republic of China

\* Corresponding authors: boboyang@sit.edu.cn, yongchen@sit.edu.cn, zoujun@sit.edu.cn.

Table S1 The contents of Rb for the samples

| x value | Rb contents<br>(mmol) | Ag contents<br>(mmol) | chemical formula                                                                           |
|---------|-----------------------|-----------------------|--------------------------------------------------------------------------------------------|
| 0       | 0                     | 1                     | $\text{Cs}_2\text{AgIn}_{0.875}\text{Bi}_{0.125}\text{Cl}_6$                               |
| 0.05    | 0.05                  | 0.95                  | $\text{Cs}_2\text{Rb}_{0.05}\text{Ag}_{0.95}\text{In}_{0.875}\text{Bi}_{0.125}\text{Cl}_6$ |
| 0.1     | 0.1                   | 0.9                   | $\text{Cs}_2\text{Rb}_{0.1}\text{Ag}_{0.9}\text{In}_{0.875}\text{Bi}_{0.125}\text{Cl}_6$   |
| 0.15    | 0.15                  | 0.85                  | $\text{Cs}_2\text{Rb}_{0.15}\text{Ag}_{0.85}\text{In}_{0.875}\text{Bi}_{0.125}\text{Cl}_6$ |
| 0.2     | 0.2                   | 0.8                   | $\text{Cs}_2\text{Rb}_{0.2}\text{Ag}_{0.8}\text{In}_{0.875}\text{Bi}_{0.125}\text{Cl}_6$   |
| 0.25    | 0.25                  | 0.75                  | $\text{Cs}_2\text{Rb}_{0.25}\text{Ag}_{0.75}\text{In}_{0.875}\text{Bi}_{0.125}\text{Cl}_6$ |
| 0.3     | 0.3                   | 0.7                   | $\text{Cs}_2\text{Rb}_{0.3}\text{Ag}_{0.7}\text{In}_{0.875}\text{Bi}_{0.125}\text{Cl}_6$   |
| 0.4     | 0.4                   | 0.6                   | $\text{Cs}_2\text{Rb}_{0.4}\text{Ag}_{0.6}\text{In}_{0.875}\text{Bi}_{0.125}\text{Cl}_6$   |
| 0.6     | 0.6                   | 0.4                   | $\text{Cs}_2\text{Rb}_{0.6}\text{Ag}_{0.4}\text{In}_{0.875}\text{Bi}_{0.125}\text{Cl}_6$   |
| 0.8     | 0.8                   | 0.2                   | $\text{Cs}_2\text{Rb}_{0.8}\text{Ag}_{0.2}\text{In}_{0.875}\text{Bi}_{0.125}\text{Cl}_6$   |
| 1       | 1                     | 0                     | $\text{Cs}_2\text{RbIn}_{0.875}\text{Bi}_{0.125}\text{Cl}_6$                               |

\*Each sample was intended to yield 1 mmol of product.

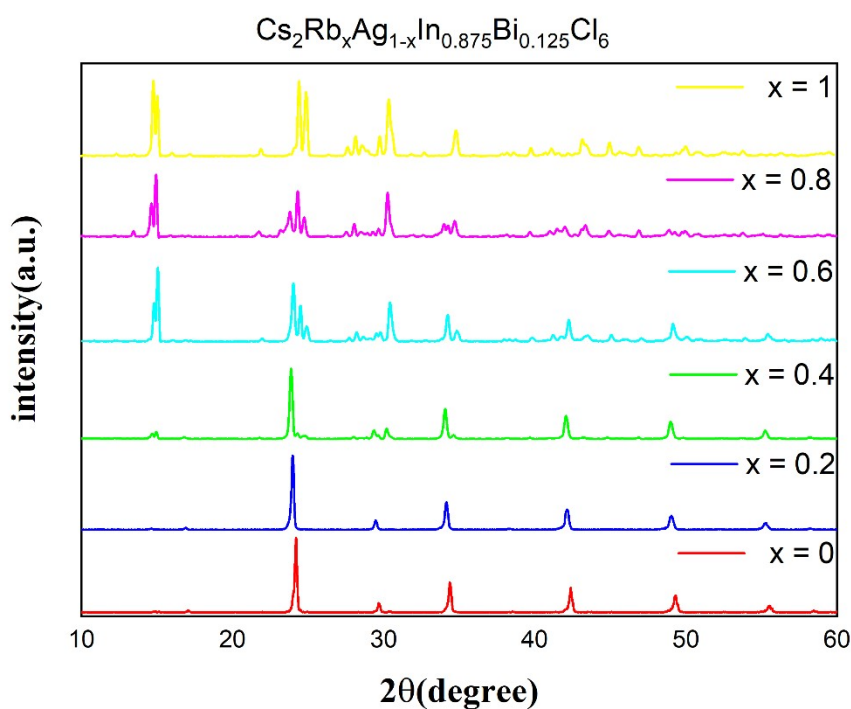

Fig S1 XRD image of  $\text{Cs}_2\text{Rb}_x\text{Ag}_{1-x}\text{In}_{0.875}\text{Bi}_{0.125}\text{Cl}_6$  ( $x=0, 0.2, 0.4, 0.6, 0.8, 1$ ).

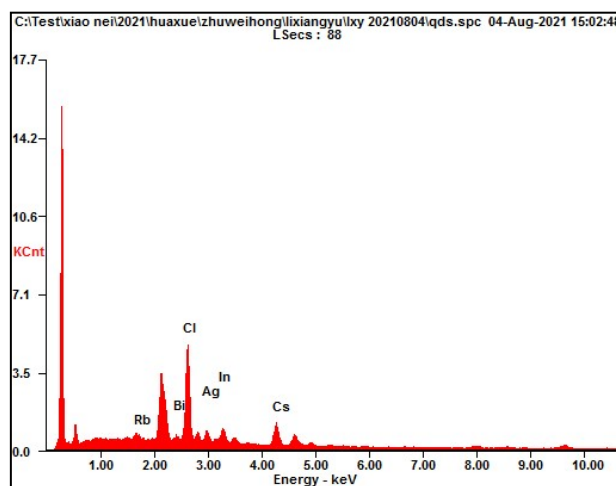

Fig S2 The EDS spectra of  $\text{Cs}_2\text{Rb}_{0.2}\text{Ag}_{0.8}\text{In}_{0.875}\text{Bi}_{0.125}\text{Cl}_6$ .

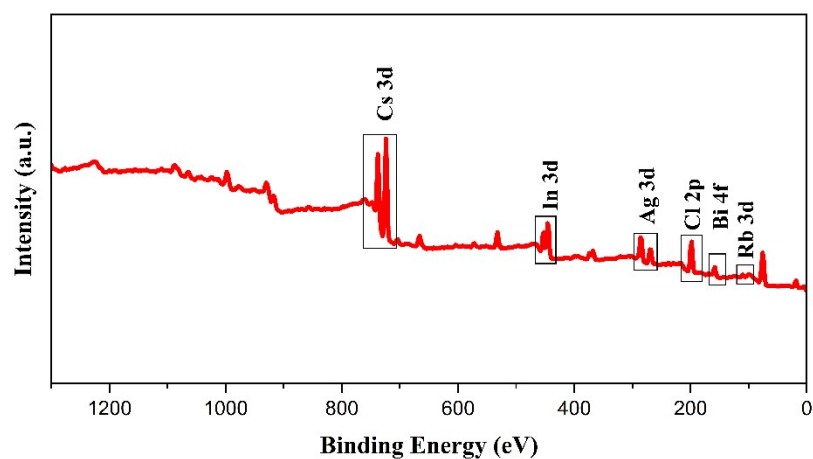

Fig S3 The XPS spectra of  $\text{Cs}_2\text{Rb}_{0.2}\text{Ag}_{0.8}\text{In}_{0.875}\text{Bi}_{0.125}\text{Cl}_6$

Table S1 Summary of the EDS analysis of  $\text{Cs}_2\text{Rb}_{0.2}\text{Ag}_{0.8}\text{In}_{0.875}\text{Bi}_{0.125}\text{Cl}_6$ .

| Element | Wt%        | At%   |
|---------|------------|-------|
| RbL     | 02.74      | 02.34 |
| BiM     | 05.04      | 01.76 |
| ClK     | 28.27      | 58.26 |
| AgL     | 10.27      | 06.96 |
| InL     | 13.55      | 08.62 |
| CsL     | 40.13      | 22.06 |
| Matrix  | Correction | ZAF   |

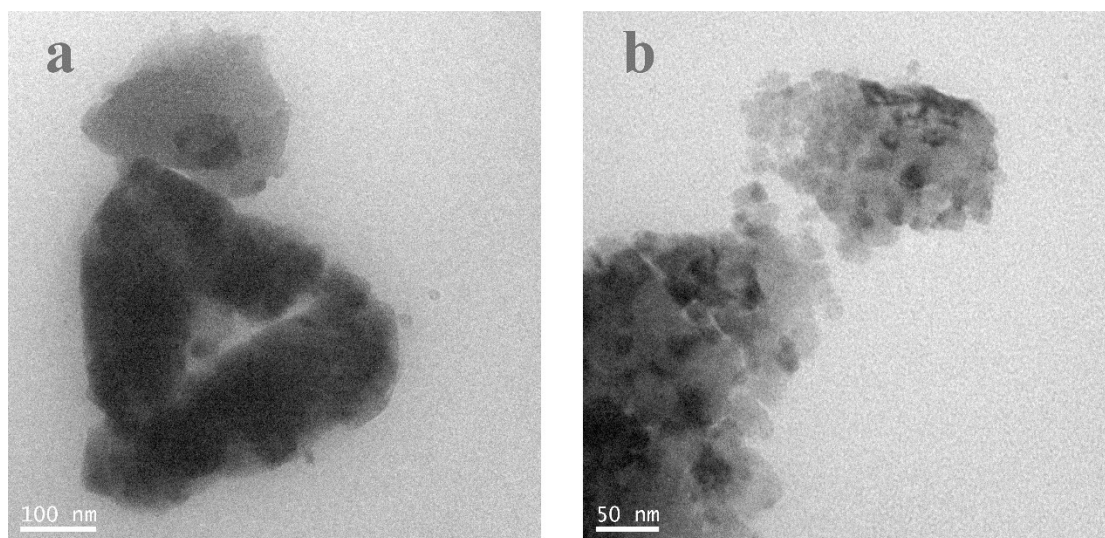

Fig S4 TEM image of  $\text{Cs}_2\text{Rb}_{0.2}\text{Ag}_{0.8}\text{In}_{0.875}\text{Bi}_{0.125}\text{Cl}_6$ , from which a microcrystalline structure can be analyzed.

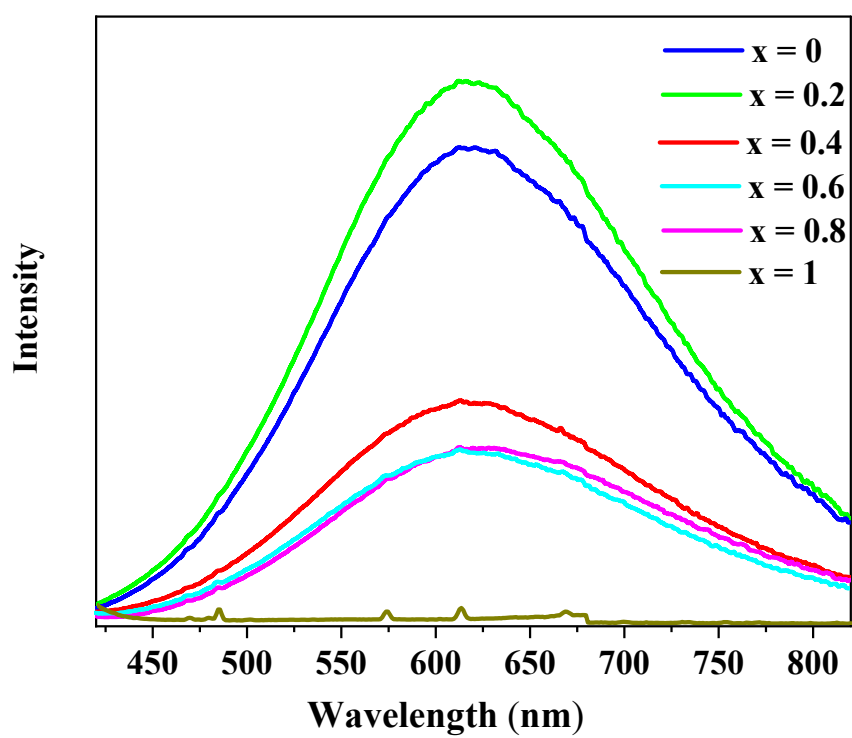

Fig S5 The emission spectra of  $\text{Cs}_2\text{Rb}_x\text{Ag}_{1-x}\text{In}_{0.875}\text{Bi}_{0.125}\text{Cl}_6$  ( $x=0, 0.2, 0.4, 0.6, 0.8, 1$ ).

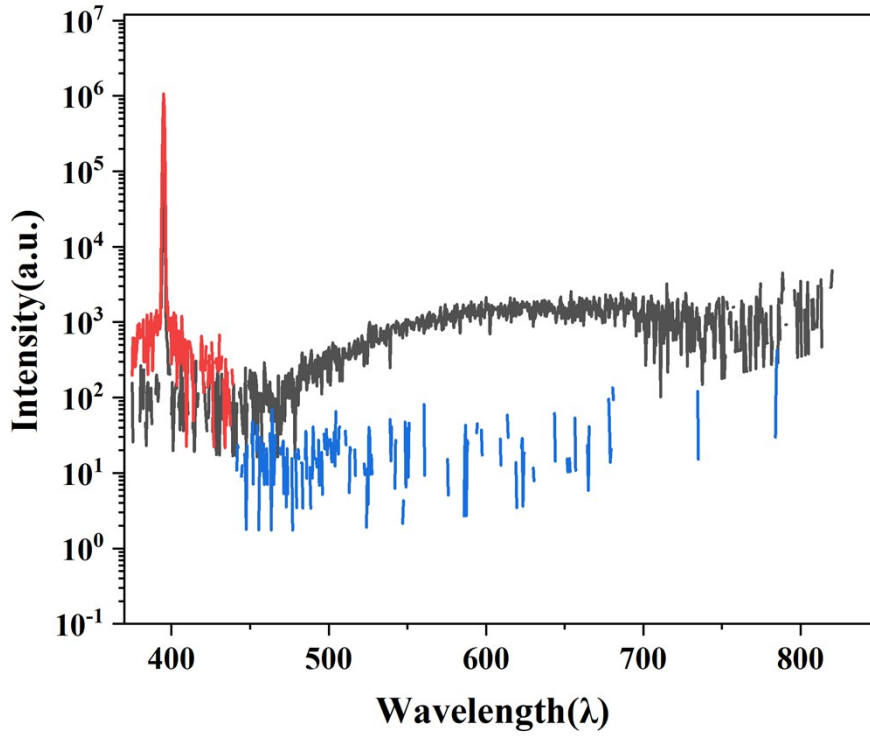

Fig S6 PL for calculation for PLQY ( $\text{Cs}_2\text{Rb}_x\text{Ag}_{1-x}\text{In}_{0.875}\text{Bi}_{0.125}\text{Cl}_6$ ,  $x = 0.15$ ). The red and blue curve represent for the PL background (measured without samples in), and the black curve represent PL for sample.

According to protocol,

$$\text{PLQY} = \frac{E_B - E_A}{S_A - S_B}$$

$S_A$  is the blank spectrum when the vessel is filled Teflon instead of the sample.  $S_B$  is the is the peak signal of the remaining excitation source after the sample placed.  $E_A$  is the fluorescence background baseline and  $E_B$  is emission signal of the sample.

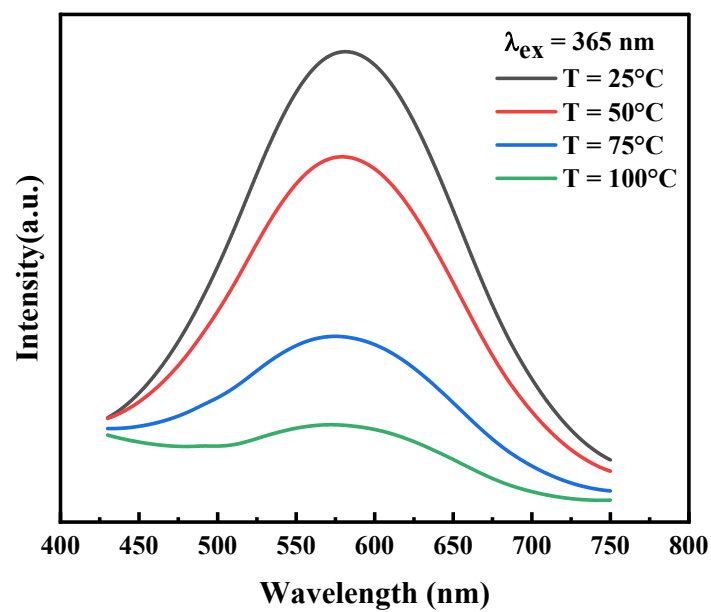

Fig S7 PL for  $\text{Cs}_2\text{Rb}_{0.15}\text{Ag}_{0.85}\text{In}_{0.875}\text{Bi}_{0.125}\text{Cl}_6$  under different temperature.

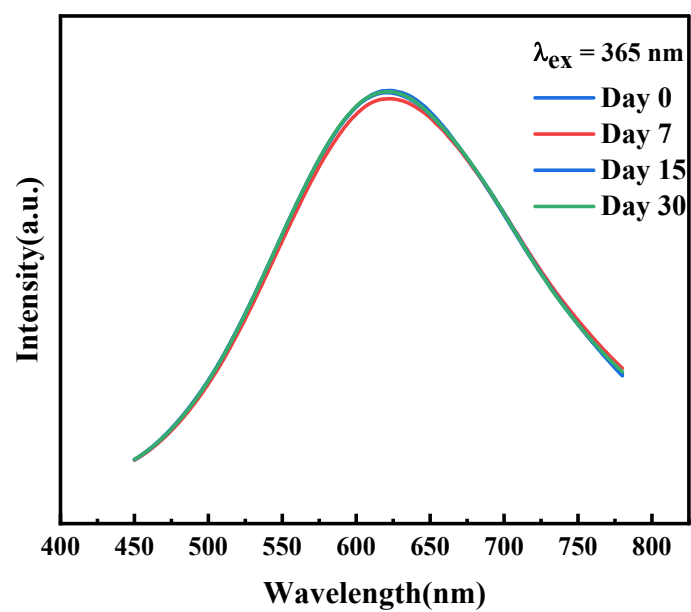

Fig S8 PL spectra for  $\text{Cs}_2\text{Rb}_{0.15}\text{Ag}_{0.85}\text{In}_{0.875}\text{Bi}_{0.125}\text{Cl}_6$  after being soaked in ethanol.
